# Supplementary material for: Campylobacter jejuni ferric–enterobactin receptor CfrA is TonB3 dependent and mediates iron acquisition from structurally different catechol siderophores
Source: Royal Society of Chemistry journal article supplement (doi:10.1039/c3mt20254b), 2013-01-01
Supplement: c3mt20254b.pdf [file c3mt20254b.pdf]

## Supplemental Figure 1.

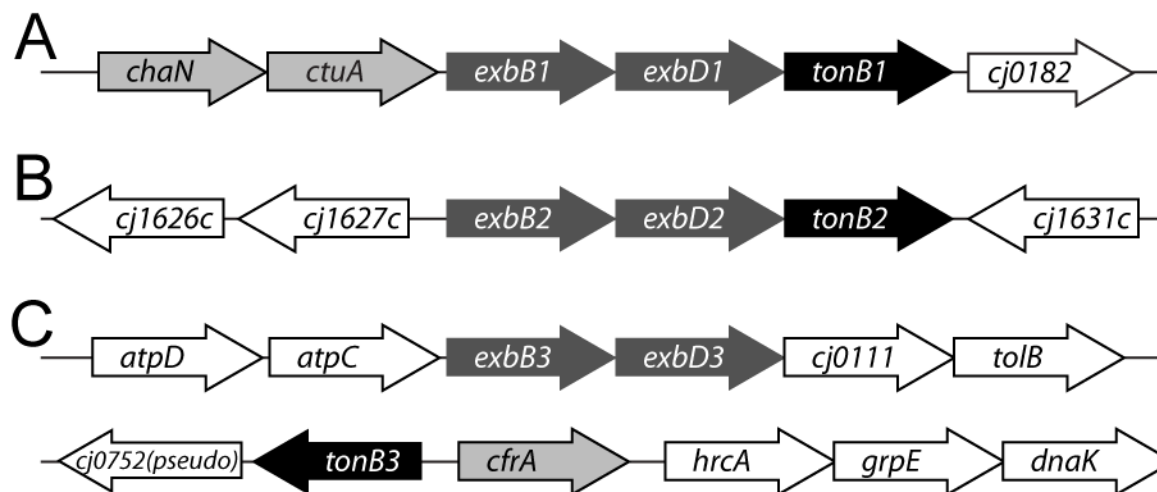

Genomic locations of *tonB1* (A), *tonB2* (B) and *tonB3* (C) and their corresponding *exbB/exbD* complexes in *Campylobacter jejuni* NCTC11168. *tonB* genes are in black, *exbB/exbD* in dark grey and miscellaneous iron related genes in light grey. The *tonB3* gene is unique as compared to other *C. jejuni tonB* genes as *tonB3* is transcribed separately from its corresponding *exbB3/exbD3* complexes. To note, *cj0752* is a pseudogene in *C. jejuni* NCTC11168
