# Supplementary material for: Campylobacter jejuni ferric–enterobactin receptor CfrA is TonB3 dependent and mediates iron acquisition from structurally different catechol siderophores
Source: Royal Society of Chemistry journal article supplement (doi:10.1039/c3mt20254b), 2013-01-01
Supplement: c3mt20254b.xlsx [file c3mt20254b.xlsx]

## Sheet: Table1_Strains
Supplementary Table 1: List of strains and plasmids used in this study
Strain or Plasmid	Description	Source
AS144	C. jejuni NCTC11168	NCTC
AS269	AS144+ΔcfrA	Palyada et al 2003
AS335	AS144+ΔchuA	This study
AS27	AS144+ΔtonB1::KmR	This study
AS240	AS144+ΔtonB2::CmR	This study
AS239	AS144+ΔtonB3::KmR	This study
AS241	AS27+ΔtonB2::CmR	This study
AS242	AS240+ΔtonB3::KmR	This study
AS355	AS27+ΔtonB3::CmR	This study
AS1132	AS144+ΔtonB3::CmR	This study
AS1133	AS1132+tonB3::KmR	This study
pAS16	pUC19+tonB1	This study
pAS20	pUC19+ΔtonB1	This study
pAS23	pUC19+ΔtonB1::KmR	This study
pAS17	pUC19+tonB2	This study
pAS24	pUC19+ΔtonB2	This study
pAS176	pUC19+ΔtonB2::CmR	This study
pAS41	pUC19+tonB3	This study
pAS42	pUC19+ΔtonB3	This study
pAS356	pUC19+ΔtonB3::KmR	This study
pAS348	pUC19+ΔtonB3::CmR	This study
pAS1150	pRRK+tonB3	This study

## Sheet: Table2_Primers
Supplementary Table 2: List of Primers used in this study
Name	Sequence	Purpose
TonB11	GGAAGATCTGCACCATTTAGATGAGCTTGC	amplify tonB1 from genome
TonB12	GGAAGATCTCACTTGCTGAATAATTTGGCT	amplify tonB1 from genome
TonB13	CGCGGATCCCAATATCAAACTTAACACAAACC	delete internal region from tonB1
TonB14	CGCGGATCCGTTATGCCTATTGATTACAAT	delete internal region from tonB1
TonB21	GGAAGATCTCGGGCAATATAGATGTCAAATC	amplify tonB2 from genome
TonB22	GGAAGATCTTCTGATGATGCAAATATAGAAG	amplify tonB2 from genome
TonB23	CGCGCATCCTATATAAGAAGCTTGGTATTTATG	delete internal region from tonB2
TonB24	CGCGGATCCCCACACTATAATGGAGATTTAG	delete internal region from tonB2
TonB31	GGAAGATCTTGACTTGCTAGCAGTTGAAGAT	amplify tonB3 from genome
TonB32	GGCAGATCTCATTGATAGTAGCAGGAGCTTC	amplify tonB3 from genome
TonB33	GCCGGATCCACTATACGCATAGCTTCTAAA	delete internal region from tonB3
TonB34	CGCGGATCCTCCACATTTTTGTTTATTTCACTA	delete internal region from tonB3
TonB3_SE	CGGTACCCGGGGATCCttgttatttttctctgtgaaatttgtt	amplify tonB1 from genome
TonB3_AS	CGACTCTAGAGGATCCcgtttgggttaggaattagcc	amplify tonB1 from genome
TonB3_INV_SE	GAACTAAAGGGCGCAAGCAATCGATGAAGCCCTAA	delete internal region from tonB3 for CmR cassette insertion
TonB3_INV_AS	GAACACCGCCGAGCAACAGGTTCTTTGGGTTGCAC	delete internal region from tonB3 for CmR cassette insertion
TonB3_SE_Comp	GATTTAGATGTCTAGTTGTTATTTTTCTCTGTGAAATTTGTT	amplify tonB3 from genome for insertion into pRRK
TonB3_AS_Comp	GGGGAAGCTTTCTAGCGTTTGGGTTAGGAATTAGCC	amplify tonB3 from genome for insertion into pRRK

## Sheet: Table3_Phenotypes
Supplementary Table 3: Summary of mutant phenotypes
Phenotype	NCTC11168	ΔtonB1	ΔtonB2	ΔtonB3	ΔtonB1/B2	ΔtonB1/B3	ΔtonB2/B3	ΔcfrA	ΔchuA
55Fe3+-enterobactin uptake	++++	+++*	++++	-*	+++*	-*	-*	Not Tested	Not Tested
Hb-Bovine growth	++++	++++	++++	+++	++++	NG	+++	++++	+++
Hb-Human growth	++++	++++	++++	+++	++++	NG	+++	++++	NG
Hemin growth	++++	++++	++++	++++	++++	NG	++++	++++	NG
DHB-Gly growth	++++	++++	++	++	++	++	+++	+++	++++
Trenlyscam growth	++++	++++	++++	NG	++++	NG	NG	+++	++++
Trenglucam growth	++++	++++	++++	NG	++++	NG	NG	++++	++++
Trensercam growth	++++	++++	++++	NG	+++	NG	NG	++	++++
Trenglycam growth	++++	++++	+++	NG	++	NG	NG	+++	++++
Trenbalcam growth	++++	++++	++++	NG	++++	NG	NG	++	++++
Trenmecam growth	++++	++++	++++	NG	++++	NG	NG	++	++++
Lysinecam growth	++++	++++	++++	NG	++++	NG	NG	++	++++
Enterobactin growth	++++	+++	+++	NG	+++	NG	NG	NG	++++
(DHB-Ser)2 growth	++++	++++	+++	NG	+++	NG	NG	NG	++++
Salmochelin growth	++++	+++	++++	NG	+++	NG	NG	NG	++++
Linear-enterobactin growth	++++	++++	++++	NG	++++	NG	NG	NG	++++
Enantioenterobactin growth	++++	++++	++++	NG	++++	NG	NG	NG	++++
Trenbutcam growth	NG	NG	NG	NG	NG	NG	NG	NG	NG
Non-competitive chick assays	++++	+	+++	+	+	-	-	-	++++
Competitive chick assays	NA	OC	NOC	OC	OC	OC	OC	Not Tested	Not Tested
Competitive in vitro assays	NA	NOC	NOC	OC	NOC	OC	OC	Not Tested	Not Tested
*significant difference in enterobactin uptake
"-" represents no enterobactin uptake
NA=Not applicable
NG=No growth
OC=outcompeted by wildtype
NOC=not outcompeted by wildtype
